# Supplementary material for: The Quality and Management of Penicillin Allergy Labels in Pediatric Primary Care
Source: Oxford University Press journal article supplement (doi:10.1542/peds.2022-059309), 2023-02-06
Supplement: peds_2022059309supplementarydata.pdf [file peds_2022059309supplementarydata.pdf]

Supplemental Information

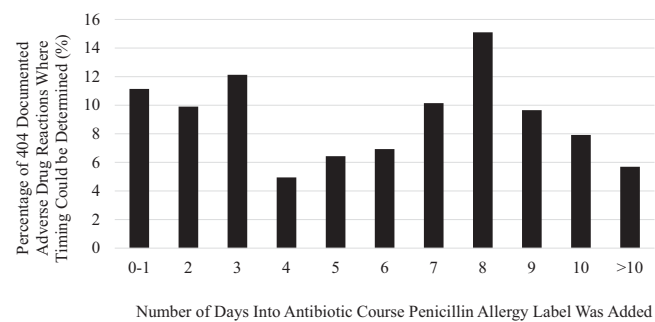

**SUPPLEMENTAL FIGURE 2**  
Number of Days Into Antibiotic Course Penicillin Allergy Label Was Added

**SUPPLEMENTAL TABLE 5** Factors Associated With Allergy Referrals From the Community

|                                                           | Referred to Allergist<br>(n = 84), n (%) | Not Referred<br>(n = 416), n (%) | Multivariable Odds Ratio<br>(95% CI) |
|-----------------------------------------------------------|------------------------------------------|----------------------------------|--------------------------------------|
| Sex                                                       |                                          |                                  |                                      |
| Male                                                      | 49 (58.3)                                | 220 (52.9)                       | Ref                                  |
| Female                                                    | 35 (41.7)                                | 196 (47.1)                       | 0.74 (0.43–1.26)                     |
| Race and ethnicity                                        |                                          |                                  |                                      |
| Non-Hispanic white                                        | 44 (52.4)                                | 256 (61.5)                       | Ref                                  |
| Hispanic                                                  | 17 (20.2)                                | 73 (17.6)                        | 2.40 (1.12–5.14)                     |
| Non-Hispanic Asian                                        | 6 (7.1)                                  | 20 (4.8)                         | 3.36 (1.08–10.52)                    |
| Non-Hispanic Black                                        | 12 (14.3)                                | 37 (8.9)                         | 1.64 (0.66–4.11)                     |
| Other or missing                                          | 5 (6.0)                                  | 30 (7.2)                         | 0.94 (0.32–2.75)                     |
| Chronic condition present <sup>a</sup>                    | 8 (9.5)                                  | 24 (5.8)                         | 1.66 (0.64–4.33)                     |
| Public insurance used <sup>a</sup>                        | 32 (38.1)                                | 120 (28.9)                       | 1.37 (0.78–2.40)                     |
| Site <sup>b</sup>                                         |                                          |                                  |                                      |
| A                                                         | 18 (21.4)                                | 232 (55.8)                       | Ref                                  |
| B                                                         | 66 (78.5)                                | 184 (44.2)                       | 5.43 (2.93–10.06)                    |
| At least 1 additional antibiotic allergy <sup>a</sup>     | 18 (21.4)                                | 28 (6.7)                         | 6.92 (3.25–14.72)                    |
| At least 1 nonantibiotic allergy <sup>a</sup>             | 24 (28.6)                                | 79 (19.0)                        | 1.92 (1.05–3.52)                     |
| Penicillin allergy label placed by physician <sup>a</sup> | 60 (71.4)                                | 243 (58.4)                       | 1.40 (0.76–2.56)                     |
| Seen by PCP within 7 d of reaction <sup>a</sup>           | 63 (75.0)                                | 266 (63.9)                       | 1.49 (0.72–3.10)                     |
| Allergy risk classification by healthcare notes           |                                          |                                  |                                      |
| Severe cutaneous                                          | 4 (4.8)                                  | 26 (6.3)                         | Ref                                  |
| Moderate or high                                          | 38 (45.2)                                | 147 (35.3)                       | 1.57 (0.47–5.20)                     |
| Low                                                       | 28 (33.3)                                | 129 (31.0)                       | 1.42 (0.42–4.83)                     |
| Not allergy                                               | 1 (1.2)                                  | 47 (11.3)                        | 0.17 (0.02–1.76)                     |
| Unable to classify                                        | 13 (15.5)                                | 67 (16.1)                        | 1.14 (0.29–4.46)                     |

PCP, primary care physician.  
<sup>a</sup> Binary yes or no variables where “no” is reference for each variable.  
<sup>b</sup> Sites A and B denote the 2 organizations represented in the birth cohort.

**SUPPLEMENTAL TABLE 6** Factors Associated With Penicillin Allergy Label Removal During the Study Period

|                                                 | Delabeled ( <i>n</i> = 69), <i>n</i> (%) | Not Delabeled ( <i>n</i> = 431), <i>n</i> (%) | Multivariable Odds Ratio <sup>a</sup> (95% CI) |
|-------------------------------------------------|------------------------------------------|-----------------------------------------------|------------------------------------------------|
| Sex                                             |                                          |                                               |                                                |
| Male                                            | 41 (59.4)                                | 228 (52.9)                                    | Ref                                            |
| Female                                          | 28 (40.6)                                | 203 (47.1)                                    | 0.74 (0.41–1.33)                               |
| Race and ethnicity                              |                                          |                                               |                                                |
| Non-Hispanic white                              | 49 (71.0)                                | 251 (58.2)                                    | Ref                                            |
| Hispanic                                        | 11 (15.9)                                | 79 (18.3)                                     | 0.61 (0.26–1.43)                               |
| Non-Hispanic Asian                              | 3 (4.4)                                  | 23 (5.3)                                      | 0.56 (0.14–2.29)                               |
| Non-Hispanic Black                              | 2 (2.9)                                  | 47 (10.9)                                     | 0.11 (0.02–0.56)                               |
| Other or missing                                | 4 (5.8)                                  | 31 (7.2)                                      | 0.56 (0.16–1.93)                               |
| Chronic condition present <sup>a</sup>          | 6 (8.7)                                  | 26 (6.0)                                      | 2.07 (0.68–6.34)                               |
| Public insurance used <sup>a</sup>              | 19 (27.5)                                | 133 (30.9)                                    | 0.98 (0.49–1.96)                               |
| Site <sup>b</sup>                               |                                          |                                               |                                                |
| A                                               | 26 (37.7)                                | 224 (52.0)                                    | Ref                                            |
| B                                               | 43 (62.3)                                | 207 (48.0)                                    | 1.46 (0.75–2.82)                               |
| Allergy risk classification by healthcare notes |                                          |                                               |                                                |
| Severe cutaneous                                | 2 (2.9)                                  | 28 (6.5)                                      | Ref                                            |
| Moderate or high                                | 19 (27.5)                                | 166 (38.5)                                    | 1.84 (0.32–10.58)                              |
| Low                                             | 25 (36.2)                                | 132 (30.6)                                    | 4.58 (0.78–26.72)                              |
| Not allergy                                     | 17 (24.6)                                | 31 (7.2)                                      | 23.00 (3.69–143.03)                            |
| Unable to classify                              | 6 (8.7)                                  | 74 (17.2)                                     | 2.53 (0.37–17.34)                              |
| Seen by allergist <sup>a</sup>                  | 43 (62.3)                                | 403 (93.5)                                    | 14.92 (6.96–31.94)                             |

<sup>a</sup> Binary yes or no variables where “no” is reference for each variable.

<sup>b</sup> Sites A and B denote the 2 organizations represented in the birth cohort.

**SUPPLEMENTAL TABLE 7** Allergy Risk Classification of the 69 Children Delabeled During the Study, Stratified by Location Where Delabeling Occurred

| Risk Classification of Penicillin Allergy Label by Healthcare Notes | <i>n</i> (%) | <i>P</i> |
|---------------------------------------------------------------------|--------------|----------|
| Primary care clinic ( <i>n</i> = 43)                                |              |          |
| Severe cutaneous                                                    | 0 (0)        | <.001    |
| Moderate or high                                                    | 8 (18.6)     |          |
| Low                                                                 | 14 (32.6)    |          |
| Not allergy                                                         | 17 (39.5)    |          |
| Unable to classify                                                  | 4 (9.3)      |          |
| Allergy and immunology ( <i>n</i> = 26)                             |              |          |
| Severe cutaneous                                                    | 2 (7.7)      | .69      |
| Moderate or high                                                    | 11 (42.3)    |          |
| Low                                                                 | 11 (42.3)    |          |
| Not allergy                                                         | 0 (0)        |          |
| Unable to classify                                                  | 2 (7.7)      |          |
